# Supplementary material for: The safety of combined triple drug therapy with ivermectin, diethylcarbamazine and albendazole in the neglected tropical diseases co-endemic setting of Fiji: A cluster randomised trial
Source: PLOS journal article supplement (doi:10.1371/journal.pntd.0008106), 2020-03-16
Supplement: S6 (10.1371/journal.pntd.0008106.s006) [file journal.pntd.0008106.s006]

**S3 Table. CONSORT 2010 checklist of information to include when reporting a cluster randomised trial**

| Section/Topic                    | Item No | Standard Checklist item                                                                                                 | Extension for cluster designs                                                                | Section, Paragraph                   |
|----------------------------------|---------|-------------------------------------------------------------------------------------------------------------------------|----------------------------------------------------------------------------------------------|--------------------------------------|
| <b>Title and abstract</b>        |         |                                                                                                                         |                                                                                              |                                      |
|                                  | 1a      | Identification as a randomised trial in the title                                                                       | Identification as a cluster randomised trial in the title                                    | Title                                |
|                                  | 1b      | Structured summary of trial design, methods, results, and conclusions (for specific guidance see CONSORT for abstracts) | See additional abstract table below                                                          | Abstract                             |
| <b>Introduction</b>              |         |                                                                                                                         |                                                                                              |                                      |
| <b>Background and objectives</b> | 2a      | Scientific background and explanation of rationale                                                                      | Rationale for using a cluster design                                                         | Introduction                         |
|                                  | 2b      | Specific objectives or hypotheses                                                                                       | Whether objectives pertain to the cluster level, the individual participant level or both    | Introduction, Para 5                 |
| <b>Methods</b>                   |         |                                                                                                                         |                                                                                              |                                      |
| <b>Trial design</b>              | 3a      | Description of trial design (such as parallel, factorial) including allocation ratio                                    | Definition of cluster and description of how the design features apply to the clusters       | Methods, Para 4                      |
|                                  | 3b      | Important changes to methods after trial commencement (such as eligibility criteria), with reasons                      |                                                                                              | N/A                                  |
| <b>Participants</b>              | 4a      | Eligibility criteria for participants                                                                                   | Eligibility criteria for clusters                                                            | Methods, Para 4<br>Methods, Para 8   |
|                                  | 4b      | Settings and locations where the data were collected                                                                    |                                                                                              | Methods, Para 2 & 3                  |
| <b>Interventions</b>             | 5       | The interventions for each group with sufficient details to allow replication, including how                            | Whether interventions pertain to the cluster level, the individual participant level or both | Methods, Para 1<br>Methods, Para 5-7 |

|                                         |    |                                                                                                                                                                                             |                                                                                                                                                                                                                    |                                           |
|-----------------------------------------|----|---------------------------------------------------------------------------------------------------------------------------------------------------------------------------------------------|--------------------------------------------------------------------------------------------------------------------------------------------------------------------------------------------------------------------|-------------------------------------------|
|                                         |    | and when they were actually administered                                                                                                                                                    |                                                                                                                                                                                                                    |                                           |
| <b>Outcomes</b>                         | 6a | Completely defined pre-specified primary and secondary outcome measures, including how and when they were assessed                                                                          | Whether outcome measures pertain to the cluster level, the individual participant level or both                                                                                                                    | Methods, Para 9-11<br>Methods, Para 13-15 |
|                                         | 6b | Any changes to trial outcomes after the trial commenced, with reasons                                                                                                                       |                                                                                                                                                                                                                    | N/A                                       |
| <b>Sample size</b>                      | 7a | How sample size was determined                                                                                                                                                              | Method of calculation, number of clusters(s) (and whether equal or unequal cluster sizes are assumed), cluster size, a coefficient of intracluster correlation (ICC or $k$ ), and an indication of its uncertainty | Methods, Para 4<br>Methods, Para 18       |
|                                         | 7b | When applicable, explanation of any interim analyses and stopping guidelines                                                                                                                |                                                                                                                                                                                                                    | N/A                                       |
| <b>Randomisation:</b>                   |    |                                                                                                                                                                                             |                                                                                                                                                                                                                    |                                           |
| <b>Sequence generation</b>              | 8a | Method used to generate the random allocation sequence                                                                                                                                      |                                                                                                                                                                                                                    | Methods, Para 4                           |
|                                         | 8b | Type of randomisation; details of any restriction (such as blocking and block size)                                                                                                         | Details of stratification or matching if used                                                                                                                                                                      | Methods, Para 4                           |
| <b>Allocation concealment mechanism</b> | 9  | Mechanism used to implement the random allocation sequence (such as sequentially numbered containers), describing any steps taken to conceal the sequence until interventions were assigned | Specification that allocation was based on clusters rather than individuals and whether allocation concealment (if any) was at the cluster level, the individual participant level or both                         | Methods, Para 4                           |
| <b>Implementation</b>                   | 10 | Who generated the random allocation sequence, who enrolled participants, and who                                                                                                            | Replace by 10a, 10b and 10c                                                                                                                                                                                        |                                           |

|                                                      |     |                                                                                                                                                                     |                                                                                                       |                                                                    |
|------------------------------------------------------|-----|---------------------------------------------------------------------------------------------------------------------------------------------------------------------|-------------------------------------------------------------------------------------------------------|--------------------------------------------------------------------|
| assigned participants to interventions               |     |                                                                                                                                                                     |                                                                                                       |                                                                    |
|                                                      | 10a | Who generated the random allocation sequence, who enrolled clusters, and who assigned clusters to interventions                                                     |                                                                                                       | Methods, Para 4                                                    |
|                                                      | 10b | Mechanism by which individual participants were included in clusters for the purposes of the trial (such as complete enumeration, random sampling)                  |                                                                                                       | Methods, Para 4<br>Methods, Para 8                                 |
|                                                      | 10c | From whom consent was sought (representatives of the cluster, or individual cluster members, or both), and whether consent was sought before or after randomisation |                                                                                                       | Methods, Para 4<br>Methods, Para 8                                 |
|                                                      |     |                                                                                                                                                                     |                                                                                                       |                                                                    |
| Blinding                                             | 11a | If done, who was blinded after assignment to interventions (for example, participants, care providers, those assessing outcomes) and how                            |                                                                                                       | N/A                                                                |
|                                                      | 11b | If relevant, description of the similarity of interventions                                                                                                         |                                                                                                       | N/A                                                                |
| Statistical methods                                  | 12a | Statistical methods used to compare groups for primary and secondary outcomes                                                                                       | How clustering was taken into account                                                                 | Methods, Para 17                                                   |
|                                                      | 12b | Methods for additional analyses, such as subgroup analyses and adjusted analyses                                                                                    |                                                                                                       | Methods, Para 17                                                   |
| Results                                              |     |                                                                                                                                                                     |                                                                                                       |                                                                    |
| Participant flow (a diagram is strongly recommended) | 13a | For each group, the numbers of participants who were randomly assigned, received intended treatment, and                                                            | For each group, the numbers of clusters that were randomly assigned, received intended treatment, and | Results, Para 1<br>Fig 1, Table 1, S4 Table<br>Results, Para 5 & 6 |

|                         |     |                                                                                                                                                   |                                                                                                                                            |                                                                                                          |
|-------------------------|-----|---------------------------------------------------------------------------------------------------------------------------------------------------|--------------------------------------------------------------------------------------------------------------------------------------------|----------------------------------------------------------------------------------------------------------|
|                         |     | were analysed for the primary outcome                                                                                                             | were analysed for the primary outcome                                                                                                      |                                                                                                          |
|                         | 13b | For each group, losses and exclusions after randomisation, together with reasons                                                                  | For each group, losses and exclusions for both clusters and individual cluster members                                                     | Results, Para 1<br>Fig 1, S5 Table<br>Results, Para 5 & 6                                                |
| Recruitment             | 14a | Dates defining the periods of recruitment and follow-up                                                                                           |                                                                                                                                            | Results, Para 1                                                                                          |
|                         | 14b | Why the trial ended or was stopped                                                                                                                |                                                                                                                                            | N/A                                                                                                      |
| Baseline data           | 15  | A table showing baseline demographic and clinical characteristics for each group                                                                  | Baseline characteristics for the individual and cluster levels as applicable for each group                                                | Table 1,<br>S4 Table, S6 Table                                                                           |
| Numbers analysed        | 16  | For each group, number of participants (denominator) included in each analysis and whether the analysis was by original assigned groups           | For each group, number of clusters included in each analysis                                                                               | Fig 1, Table 1<br>S4 Table, S6 Table<br>Results, Para 1 & 5                                              |
| Outcomes and estimation | 17a | For each primary and secondary outcome, results for each group, and the estimated effect size and its precision (such as 95% confidence interval) | Results at the individual or cluster level as applicable and a coefficient of intracluster correlation (ICC or k) for each primary outcome | Results, Para 2 & 3<br>Results, Para 6-7<br>Results, Para 12<br>Table 1 & 2, Fig 2<br>S6 Table, S7 Table |
|                         | 17b | For binary outcomes, presentation of both absolute and relative effect sizes is recommended                                                       |                                                                                                                                            | N/A                                                                                                      |
| Ancillary analyses      | 18  | Results of any other analyses performed, including subgroup analyses and adjusted analyses, distinguishing pre-specified from exploratory         |                                                                                                                                            | Results, Para 8-11<br>Results, Para 13<br>Table 3                                                        |
| Harms                   | 19  | All important harms or unintended effects in each group (for specific                                                                             |                                                                                                                                            | Results, Para 6 & 7                                                                                      |

|                   |    |                                                                                                                  |                                                                           |                                                          |
|-------------------|----|------------------------------------------------------------------------------------------------------------------|---------------------------------------------------------------------------|----------------------------------------------------------|
|                   |    | guidance see CONSORT for harms <sup>1</sup> )                                                                    |                                                                           | Table 2, Fig 2<br>Results, Para 12<br>S6 Table, S7 Table |
| Discussion        |    |                                                                                                                  |                                                                           |                                                          |
| Limitations       | 20 | Trial limitations, addressing sources of potential bias, imprecision, and, if relevant, multiplicity of analyses |                                                                           | Discussion, Para 3<br>Discussion, Para 5                 |
| Generalisability  | 21 | Generalisability (external validity, applicability) of the trial findings                                        | Generalisability to clusters and/or individual participants (as relevant) | Discussion, Para 6 & 7                                   |
| Interpretation    | 22 | Interpretation consistent with results, balancing benefits and harms, and considering other relevant evidence    |                                                                           | Discussion, Para 1-3<br>Discussion, Para 6 & 7           |
| Other information |    |                                                                                                                  |                                                                           |                                                          |
| Registration      | 23 | Registration number and name of trial registry                                                                   |                                                                           | Methods, Para 19                                         |
| Protocol          | 24 | Where the full trial protocol can be accessed, if available                                                      |                                                                           | S1 Protocol                                              |
| Funding           | 25 | Sources of funding and other support (such as supply of drugs), role of funders                                  |                                                                           | Abstract, Para 5 & 6                                     |

---
